# Supplementary material for: No Associations between Dairy Intake and Markers of Gastrointestinal Inflammation in Healthy Adult Cohort
Source: MDPI journal article supplement (doi:10.3390/nu15163504), 2023-08-08
Supplement: s1 [file s1]

**Table S1.** Results from linear regression between total dairy intake (cup equivalents per day) from food frequency questionnaire (FFQ) and markers of GI inflammation adjusted for age, sex, and BMI. Results from linear regression between age, sex, or BMI vs. GI inflammation markers are also shown.

| <i>Predictors</i>                           | Transformed Calprotectin  |                | Transformed Myeloperoxidase |                | Transformed Neopterin     |                | Transformed LPS-binding protein |                  |
|---------------------------------------------|---------------------------|----------------|-----------------------------|----------------|---------------------------|----------------|---------------------------------|------------------|
|                                             | <i>Estimates (95% CI)</i> | <i>P-value</i> | <i>Estimates (95% CI)</i>   | <i>P-value</i> | <i>Estimates (95% CI)</i> | <i>P-value</i> | <i>Estimates (95% CI)</i>       | <i>P-value</i>   |
| Total Dairy                                 | 0.03<br>(-0.07 – 0.14)    | 0.544          | 0.00<br>(-0.12 – 0.13)      | 0.949          | -0.04<br>(-0.14 – 0.07)   | 0.478          | 0.01<br>(-0.04 – 0.05)          | 0.734            |
| Age                                         | -0.00<br>(-0.01 – 0.00)   | 0.225          | 0.00<br>(-0.01 – 0.01)      | 0.902          | -0.00<br>(-0.01 – 0.00)   | 0.314          | 0.00<br>(-0.00 – 0.01)          | 0.216            |
| Sex                                         | 0.16<br>(-0.06 – 0.38)    | 0.160          | 0.14<br>(-0.13 – 0.40)      | 0.304          | 0.34<br>(0.10 – 0.57)     | <b>0.005</b>   | 0.15<br>(0.05 – 0.24)           | <b>0.002</b>     |
| BMI                                         | 0.00<br>(-0.02 – 0.02)    | 0.868          | -0.00<br>(-0.03 – 0.02)     | 0.903          | 0.02<br>(-0.01 – 0.04)    | 0.174          | 0.04<br>(0.03 – 0.05)           | <b>&lt;0.001</b> |
| R <sup>2</sup> / R <sup>2</sup><br>adjusted | 0.012 / -0.002            |                | 0.004 / -0.010              |                | 0.043 / 0.030             |                | 0.224 / 0.215                   |                  |

**E** Regression: FFQ Total Dairy vs. Calprotectin (n = 295)  
Adj R2 = -0.0017023 , Intercept = 3.6983 , Slope = 0.03297 , P = 0.54355

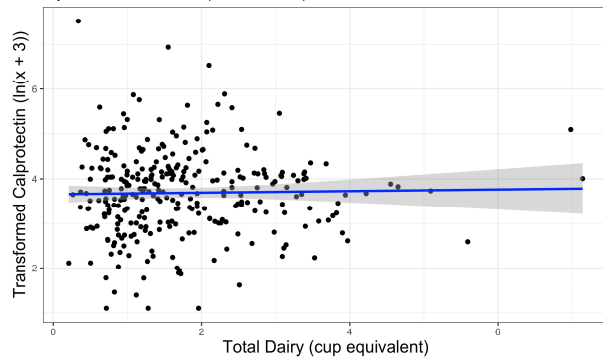

**F** Regression: FFQ Total Dairy vs. Neopterin (n = 289)  
Adj R2 = 0.029527 , Intercept = -0.3718 , Slope = -0.038079 , P = 0.4784

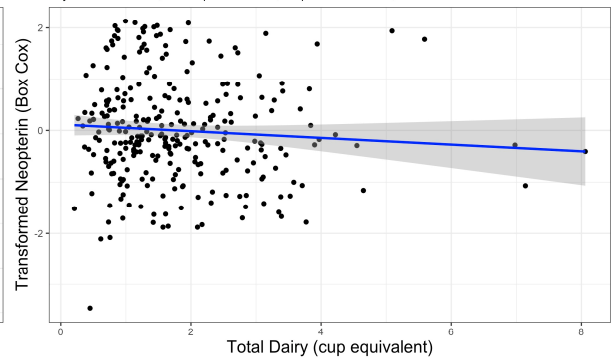

**G** Regression: FFQ Total Dairy vs. Myeloperoxidase (n = 295)  
Adj R2 = -0.0032802 , Intercept = 5.6781 , Slope = -0.012058 , P = 0.84401

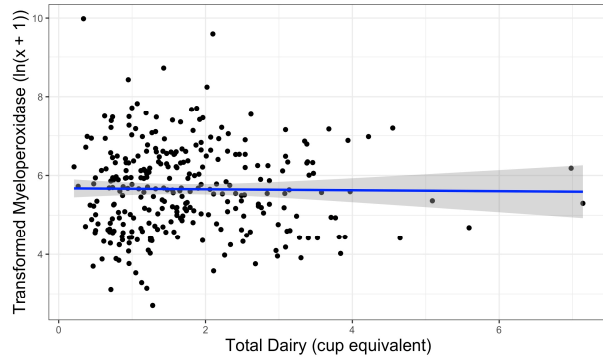

**H** Regression: FFQ Total Dairy vs. LPS-binding protein (n = 348)  
Adj R2 = 0.21536 , Intercept = 0.98161 , Slope = 0.0075041 , P = 0.73382

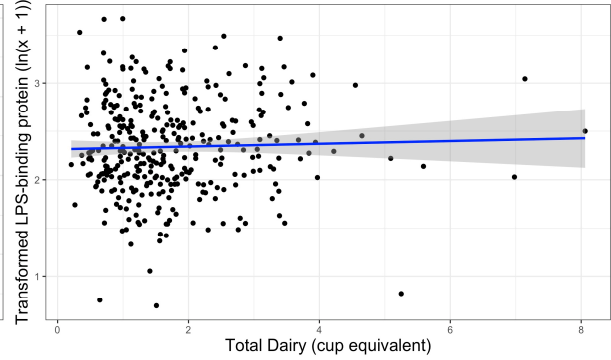

**Figure S1.** Association of habitual total dairy intake with markers of GI inflammation adjusted for sex, age, BMI.

**Table S2.** Results from linear regression between fluid milk intake (cup equivalents per day) from FFQ and markers of GI inflammation adjusted for age, sex, and BMI. Results from linear regression between age, sex, or BMI vs. GI inflammation markers are also shown.

| <i>Predictors</i>                           | Transformed Calprotectin  |                | Transformed Myeloperoxidase |                | Transformed Neopterin     |                | Transformed LPS-binding protein |                  |
|---------------------------------------------|---------------------------|----------------|-----------------------------|----------------|---------------------------|----------------|---------------------------------|------------------|
|                                             | <i>Estimates (95% CI)</i> | <i>P-value</i> | <i>Estimates (95% CI)</i>   | <i>P-value</i> | <i>Estimates (95% CI)</i> | <i>P-value</i> | <i>Estimates (95% CI)</i>       | <i>P-value</i>   |
| Fluid Milk                                  | 0.03<br>(-0.14 – 0.19)    | 0.760          | -0.01<br>(-0.21 – 0.19)     | 0.924          | -0.10<br>(-0.26 – 0.06)   | 0.225          | -0.01<br>(-0.08 – 0.05)         | 0.708            |
| Age                                         | -0.00<br>(-0.01 – 0.00)   | 0.229          | 0.00<br>(-0.01 – 0.01)      | 0.905          | -0.00<br>(-0.01 – 0.00)   | 0.294          | 0.00<br>(-0.00 – 0.01)          | 0.219            |
| Sex                                         | 0.15<br>(-0.07 – 0.37)    | 0.183          | 0.13<br>(-0.13 – 0.40)      | 0.317          | 0.33<br>(0.09 – 0.56)     | <b>0.006</b>   | 0.14<br>(0.04 – 0.23)           | <b>0.004</b>     |
| BMI                                         | 0.00<br>(-0.02 – 0.02)    | 0.819          | -0.00<br>(-0.03 – 0.02)     | 0.915          | 0.02<br>(-0.01 – 0.04)    | 0.169          | 0.04<br>(0.03 – 0.05)           | <b>&lt;0.001</b> |
| R <sup>2</sup> / R <sup>2</sup><br>adjusted | 0.011 / -0.003            |                | 0.004 / -0.010              |                | 0.046 / 0.033             |                | 0.224 / 0.215                   |                  |

**E** Regression: FFQ Fluid Milk vs. Calprotectin (n = 295)

Adj R2 = -0.002657, Intercept = 3.7234, Slope = 0.026096, P = 0.76012

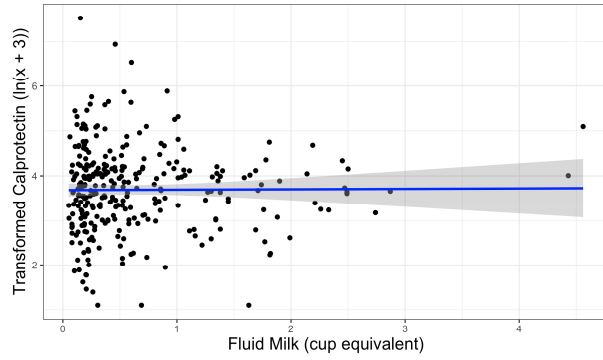

**F** Regression: FFQ Fluid Milk vs. Neopterin (n = 289)

Adj R2 = 0.032838, Intercept = -0.36246, Slope = -0.10089, P = 0.22511

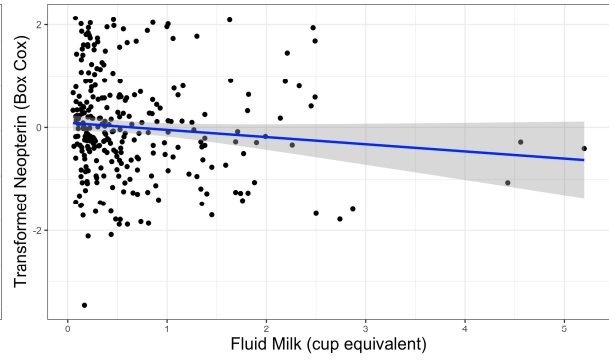

**G** Regression: FFQ Fluid Milk vs. Myeloperoxidase (n = 295)

Adj R2 = -0.009845, Intercept = 5.6102, Slope = -0.0095884, P = 0.92398

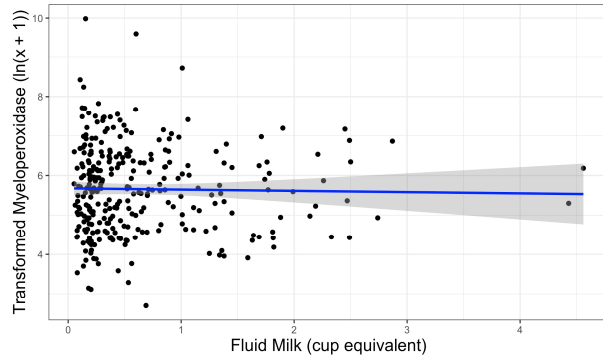

**H** Regression: FFQ Fluid Milk vs. LPS-binding protein (n = 348)

Adj R2 = 0.21542, Intercept = 0.99867, Slope = -0.012446, P = 0.70785

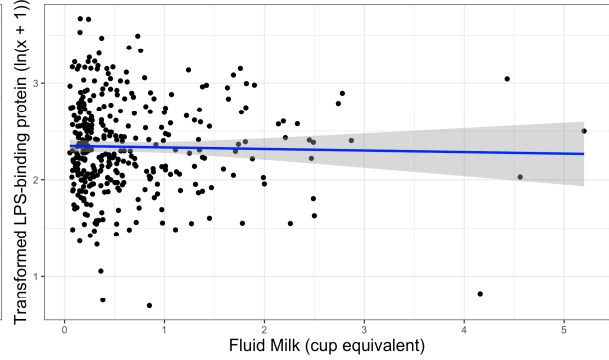

**Figure S2.** Association of habitual fluid milk intake with markers of GI inflammation after adjustment for sex, age, BMI.

**Table S3.** Results from linear regression between cheese intake (cup equivalents per day) from FFQ and markers of GI inflammation adjusted for age, sex, and BMI. Results from linear regression between age, sex, or BMI vs. GI inflammation markers are also shown.

| <i>Predictors</i>                           | Transformed Calprotectin  |                | Transformed Myeloperoxidase |                | Transformed Neopterin     |                | Transformed LPS-binding protein |                  |
|---------------------------------------------|---------------------------|----------------|-----------------------------|----------------|---------------------------|----------------|---------------------------------|------------------|
|                                             | <i>Estimates (95% CI)</i> | <i>P-value</i> | <i>Estimates (95% CI)</i>   | <i>P-value</i> | <i>Estimates (95% CI)</i> | <i>P-value</i> | <i>Estimates (95% CI)</i>       | <i>P-value</i>   |
| Cheese                                      | 0.05<br>(-0.14 – 0.24)    | 0.614          | -0.01<br>(-0.23 – 0.22)     | 0.963          | 0.02<br>(-0.18 – 0.22)    | 0.846          | 0.06<br>(-0.02 – 0.14)          | 0.171            |
| Age                                         | -0.00<br>(-0.01 – 0.00)   | 0.225          | 0.00<br>(-0.01 – 0.01)      | 0.902          | -0.00<br>(-0.01 – 0.00)   | 0.319          | 0.00<br>(-0.00 – 0.01)          | 0.210            |
| Sex                                         | 0.15<br>(-0.07 – 0.38)    | 0.172          | 0.13<br>(-0.13 – 0.40)      | 0.309          | 0.36<br>(0.13 – 0.60)     | <b>0.002</b>   | 0.15<br>(0.06 – 0.24)           | <b>0.001</b>     |
| BMI                                         | 0.00<br>(-0.02 – 0.02)    | 0.881          | -0.00<br>(-0.03 – 0.03)     | 0.918          | 0.01<br>(-0.01 – 0.04)    | 0.225          | 0.04<br>(0.03 – 0.05)           | <b>&lt;0.001</b> |
| R <sup>2</sup> / R <sup>2</sup><br>adjusted | 0.012 / -0.002            |                | 0.004 / -0.010              |                | 0.041 / 0.028             |                | 0.228 / 0.219                   |                  |

**E** Regression: FFQ Cheese vs. Calprotectin (n = 295)

Adj R2 = -0.0020986 , Intercept = 3.7213 , Slope = 0.048723 , P = 0.61392

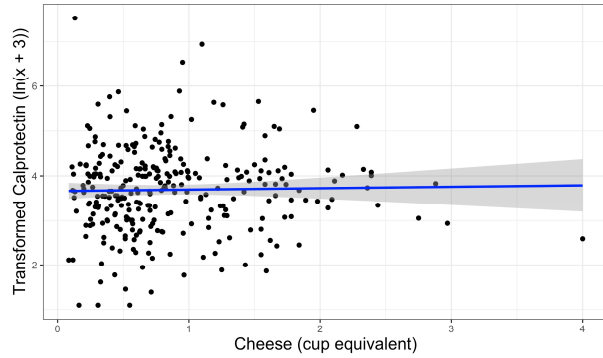

**F** Regression: FFQ Cheese vs. Neopterin (n = 289)

Adj R2 = 0.027934 , Intercept = -0.42672 , Slope = 0.019421 , P = 0.84646

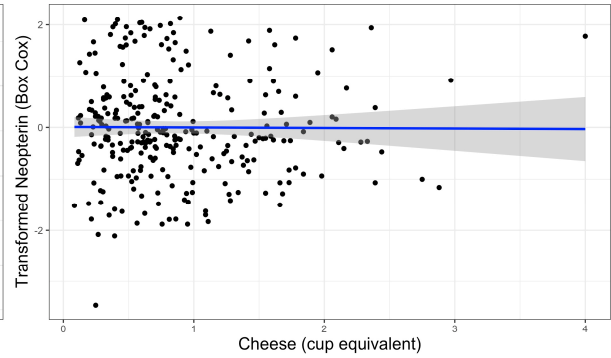

**G** Regression: FFQ Cheese vs. Myeloperoxidase (n = 295)

Adj R2 = -0.0098693 , Intercept = 5.6065 , Slope = -0.0052553 , P = 0.96309

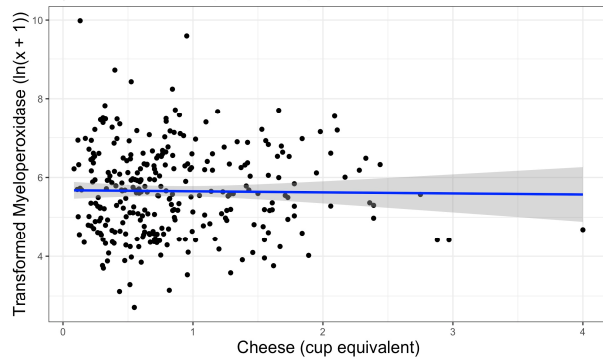

**H** Regression: FFQ Cheese vs. LPS-binding protein (n = 348)

Adj R2 = 0.21938 , Intercept = 0.9688 , Slope = 0.056624 , P = 0.17097

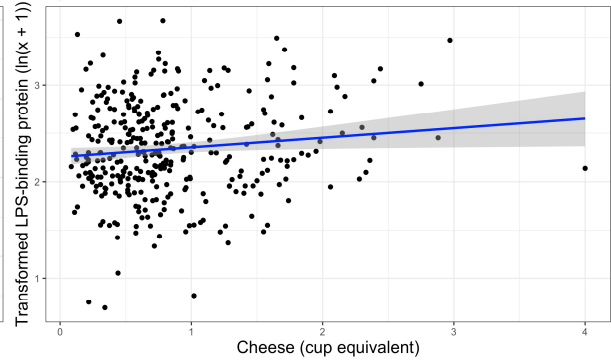

**Figure S3.** Association of habitual cheese intake with markers of GI inflammation after adjustment for sex, age, BMI.

**Table S4.** Results from linear regression between yogurt intake (cup equivalents per day) from FFQ and markers of GI inflammation adjusted for age, sex, and BMI. Results from linear regression between age, sex, or BMI vs. GI inflammation markers are also shown.

| <i>Predictors</i>                           | Transformed<br>Calprotectin |                | Transformed<br>Myeloperoxidase |                | Transformed<br>Neopterin      |                | Transformed LPS-binding<br>protein |                  |
|---------------------------------------------|-----------------------------|----------------|--------------------------------|----------------|-------------------------------|----------------|------------------------------------|------------------|
|                                             | <i>Estimates (95% CI)</i>   | <i>P-value</i> | <i>Estimates (95% CI)</i>      | <i>P-value</i> | <i>Estimates (95%<br/>CI)</i> | <i>P-value</i> | <i>Estimates (95% CI)</i>          | <i>P-value</i>   |
| Yogurt                                      | 0.08<br>(-0.38 – 0.54)      | 0.728          | -0.01<br>(-0.47 – 0.45)        | 0.955          | -0.03<br>(-0.48 – 0.42)       | 0.884          | -0.04<br>(-0.23 – 0.14)            | 0.628            |
| Age                                         | -0.01<br>(-0.01 – 0.00)     | 0.148          | 0.00<br>(-0.01 – 0.01)         | 0.944          | -0.00<br>(-0.01 – 0.00)       | 0.398          | 0.00<br>(-0.00 – 0.01)             | 0.201            |
| Sex                                         | 0.16<br>(-0.07 – 0.39)      | 0.174          | 0.13<br>(-0.11 – 0.36)         | 0.287          | 0.35<br>(0.12 – 0.58)         | <b>0.003</b>   | 0.14<br>(0.05 – 0.23)              | <b>0.002</b>     |
| BMI                                         | 0.00<br>(-0.02 – 0.02)      | 0.978          | -0.00<br>(-0.03 – 0.02)        | 0.812          | 0.01<br>(-0.01 – 0.04)        | 0.207          | 0.04<br>(0.03 – 0.05)              | <b>&lt;0.001</b> |
| R <sup>2</sup> / R <sup>2</sup><br>adjusted | 0.013 / -0.000              |                | 0.004 / -0.010                 |                | 0.039 / 0.026                 |                | 0.225 / 0.216                      |                  |

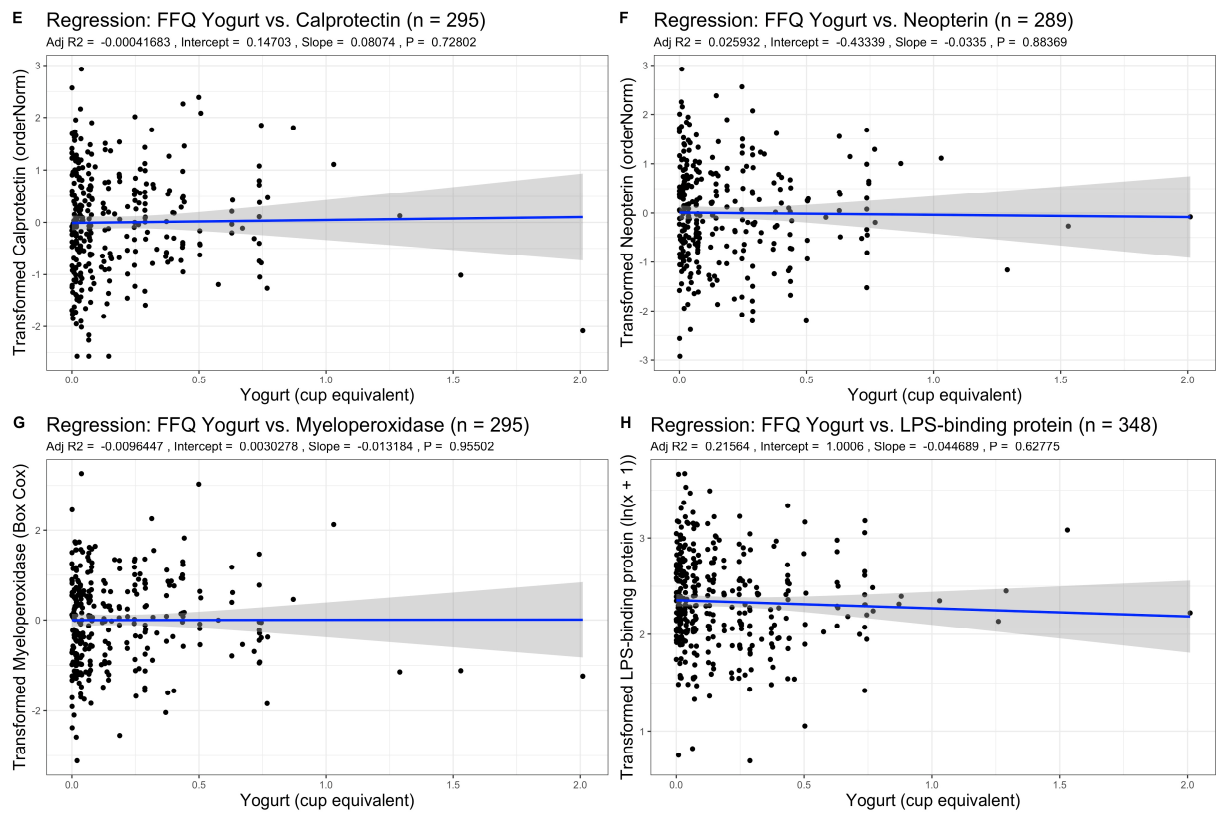

**Figure S4.** Association of habitual yogurt intake with markers of GI inflammation after adjustment for sex, age, BMI.
